# Supplementary material for: Activated macrophages are crucial during acute PM2.5 exposure-induced angiogenesis in lung cancer
Source: PubMed Central journal article supplement — Oncol Lett. 2019 Nov 21;19(1):725–34. doi: 10.3892/ol.2019.11133 (PMC6924157; doi:10.3892/ol.2019.11133), 2019-11-21

Figure S1. To determine the pro-angiogenic concentration of PM2.5, RAW264.7 cells were exposed to different concentrations of PM2.5 for 3 h. Increased mRNA expression levels of VEGF-A were observed in the 500  $\mu\text{g/ml}$  PM2.5 group. Data are presented as the mean  $\pm$  SD of three independent experiments and were analyzed by one-way ANOVA. \*\*\* $P < 0.001$  vs. control. PM, particle matter; VEGF-A, vascular endothelial growth factor A.

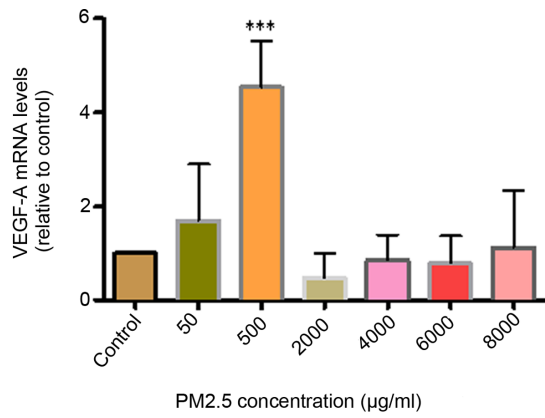

Supplement: Supplementary_Data.pdf [file Supplementary_Data.pdf]
